# Supplementary material for: One-step fabrication of trimetallic core–shell Au@PdAuCu mesoporous nanospheres for ethanol electrooxidation
Source: Royal Society of Chemistry journal article supplement (doi:10.1039/c9gc00263d), 2019-01-01
Supplement: c9gc00263d1.pdf [file c9gc00263d1.pdf]

**Electronic Supplementary Information for**

**One-Step Fabrication of Trimetallic Core-Shell Au@PdAuCu Mesoporous  
Nanospheres for Ethanol Electrooxidation**

Hao Lv,<sup>a</sup> Lizhi Sun,<sup>a</sup> Xin Chen,<sup>b</sup> Dongdong Xu,<sup>a,\*</sup> and Ben Liu<sup>a,\*</sup>

<sup>a</sup>Jiangsu Key Laboratory of New Power Batteries, Jiangsu Collaborative Innovation Center of Biomedical Functional Materials, School of Chemistry and Materials Science, Nanjing Normal University, Nanjing 210023, China

<sup>b</sup>ME Genomic Inc., Software Industry Base, Shenzhen, 51806, China

\*E-mails: ddxu@njnu.edu.cn (D. Xu); ben.liu@njnu.edu.cn (B. Liu)

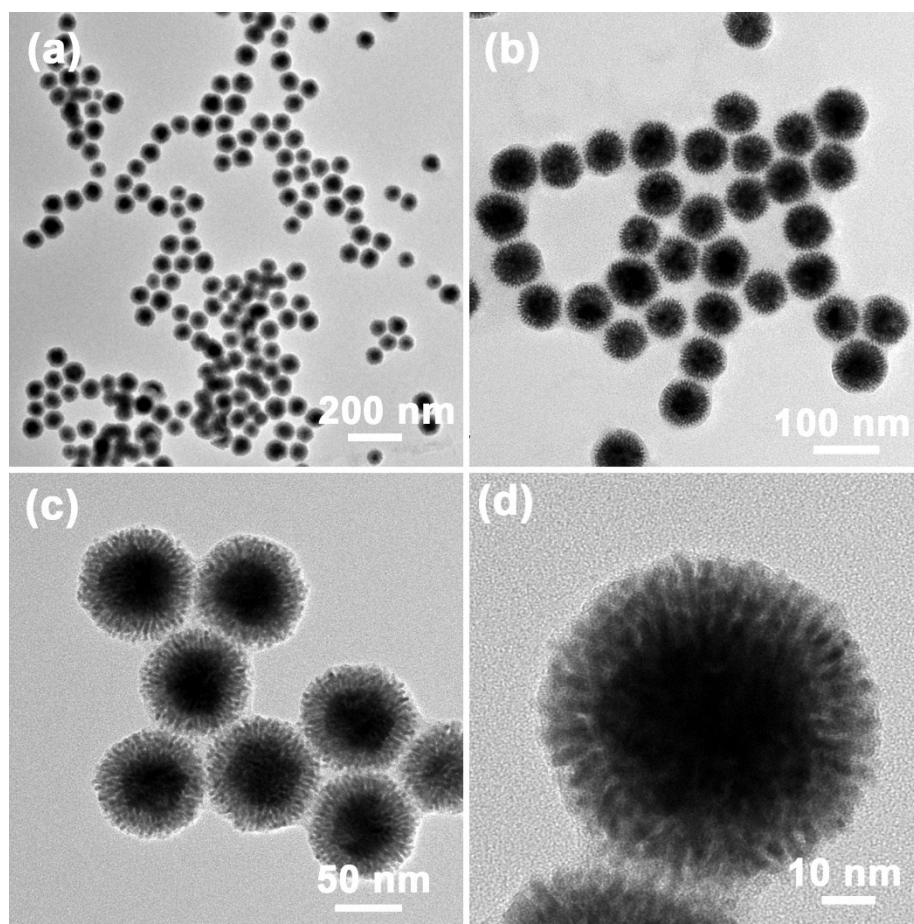

**Fig. S1** Supporting TEM images of Au@PdAuCu-5 MNSs, indicating the monodispersed feature with an average diameter of ~85 nm.

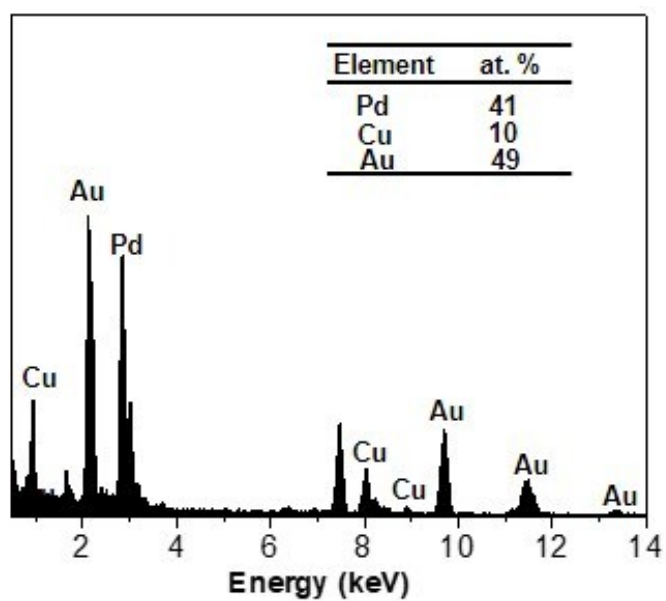

**Fig. S2** EDS spectrum of core-shell Au@PdAuCu-5 MNSs.

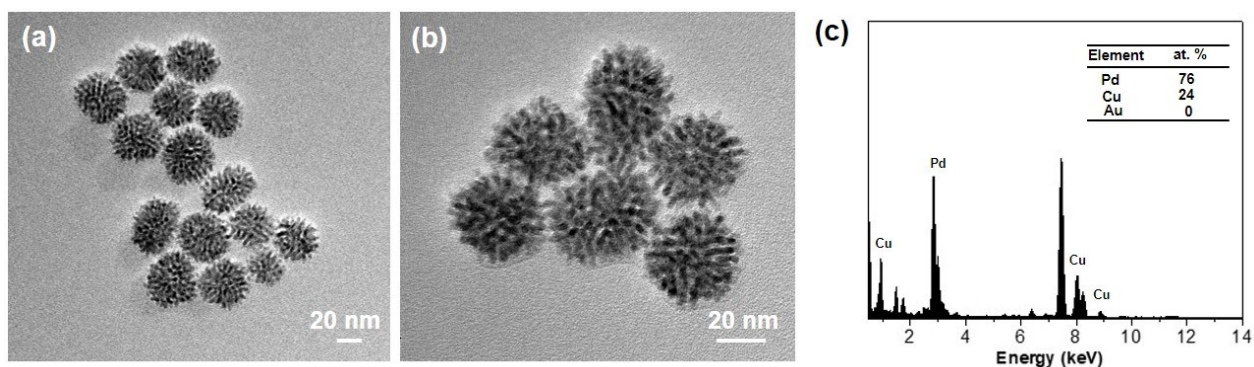

**Fig. S3** (a, b) Supporting TEM images and (c) corresponding EDS spectrum of PdCu MNSs.

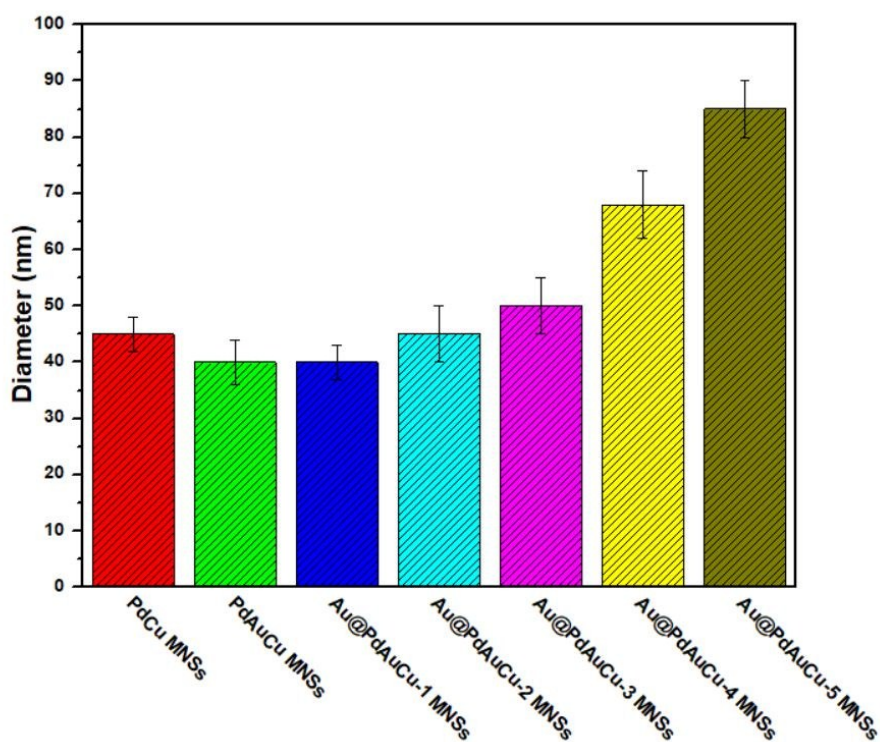

**Fig. S4** The diameters of obtained metallic mesoporous nanospheres in this work.



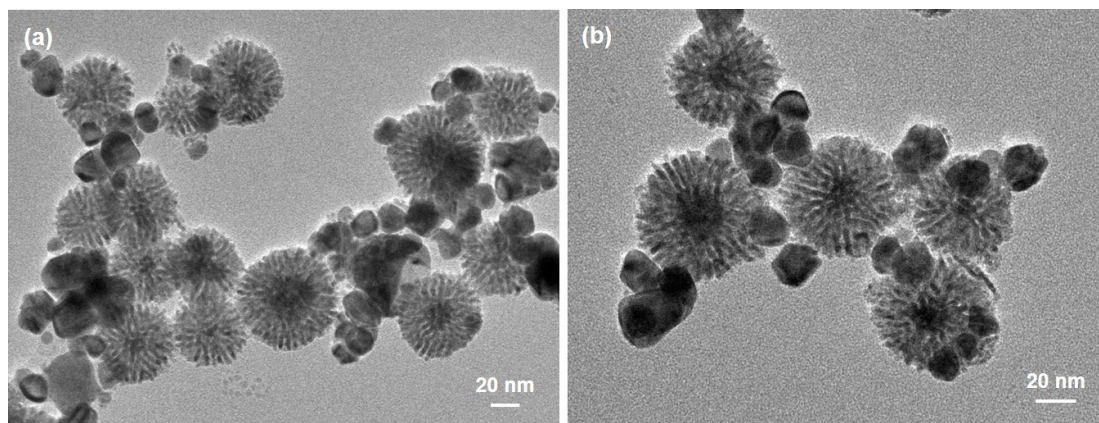

**Fig. S5** TEM images of nanostructures obtained with the  $\text{HAuCl}_4$  amount of more than 40 %.

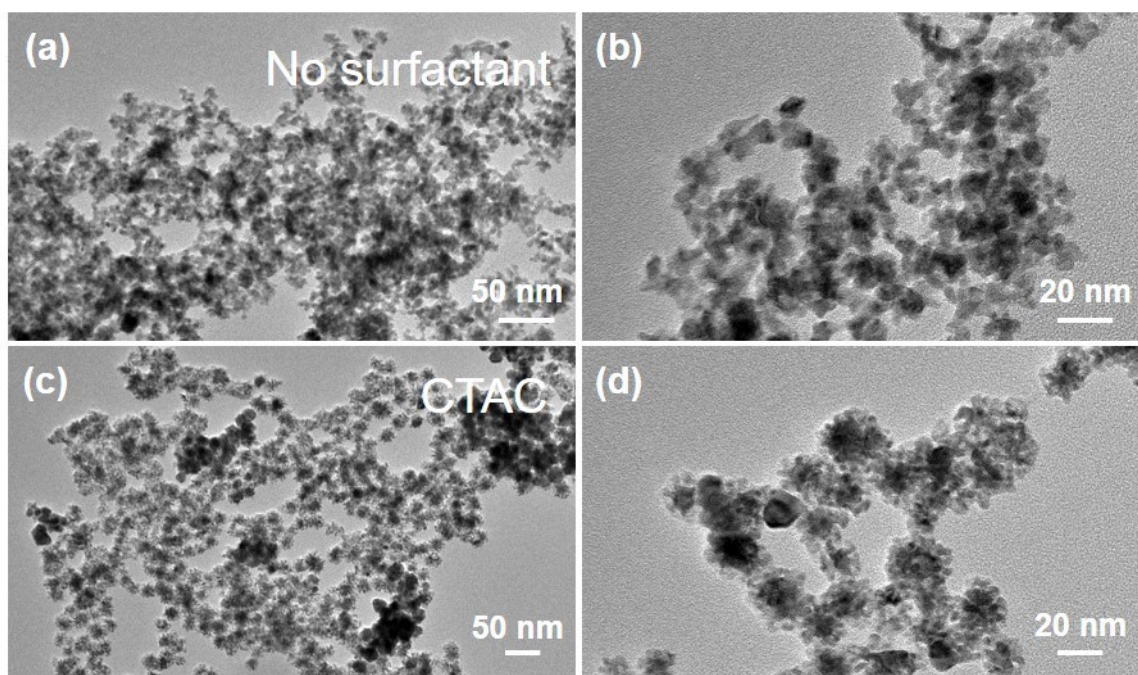

**Fig. S6** TEM images of nanoparticles synthesized (a, b) without surfactant and (c, d) with surfactant of CTAC under the similar reactants to  $\text{Au@PdAuCu}$  MNSs-5 MNSs.



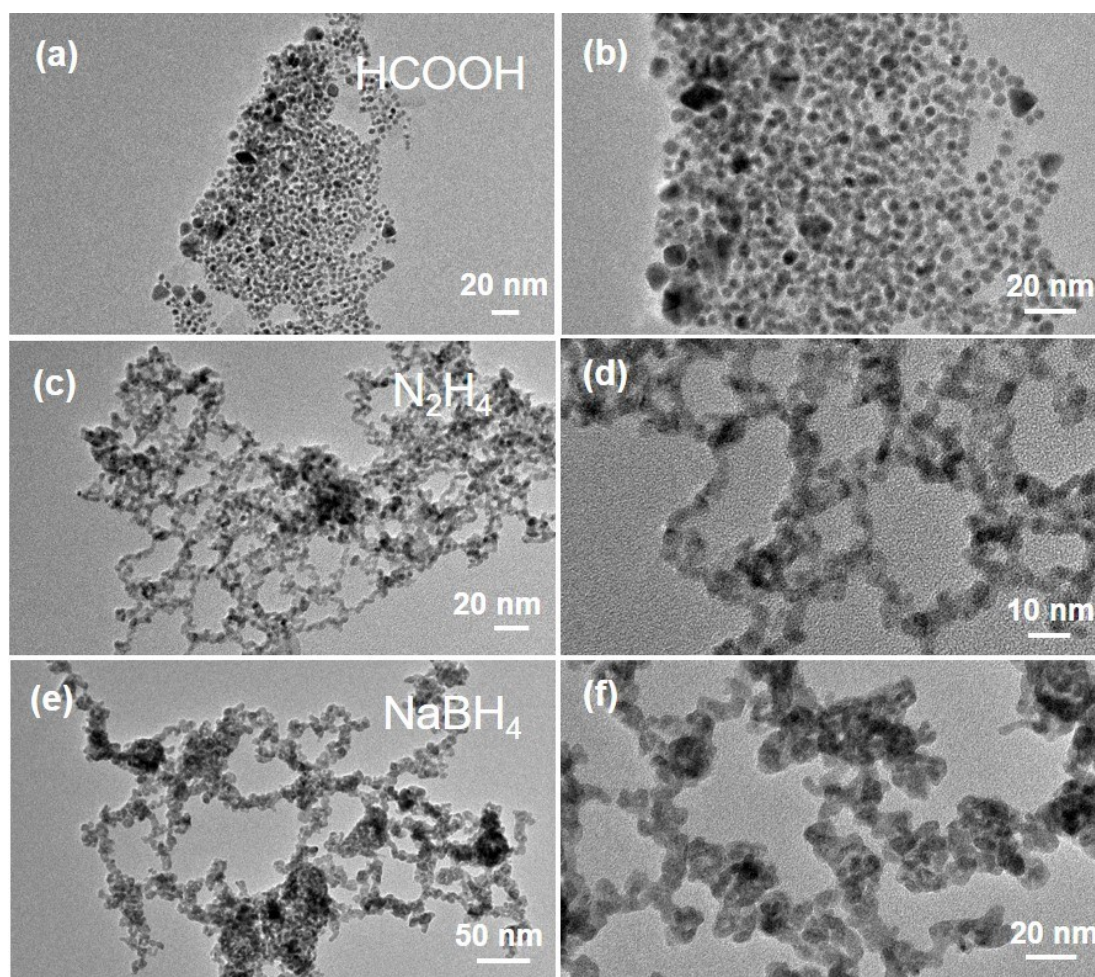

**Fig. S7** TEM images of nanoparticles synthesized with the reducing agent of (a, b) formic acid (HCOOH), (c, d) hydrazine hydrate ( $\text{N}_2\text{H}_4 \cdot \text{H}_2\text{O}$ ), and (e, f) sodium borohydride ( $\text{NaBH}_4$ ) under the similar reactants to Au@PdAuCu MNSs-5 MNSs.

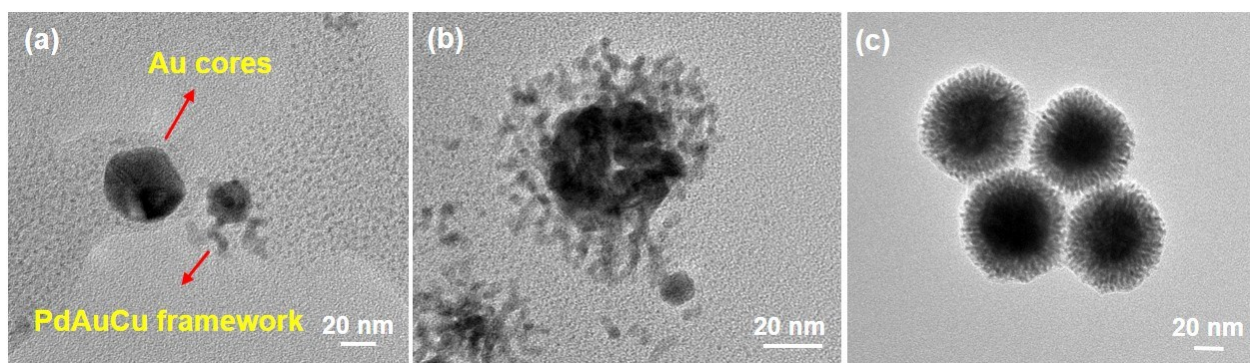

**Fig. S8** (a, b) TEM images obtained in the initial stage of core-shell Au@PdAuCu-5 MNSs, and (c) TEM image of final Au@PdAuCu-5 MNSs. These observations demonstrated that Au cores firstly formed in the initial nucleation stage and PdAuCu frameworks gradually grew on the surfaces of Au nanocrystals.

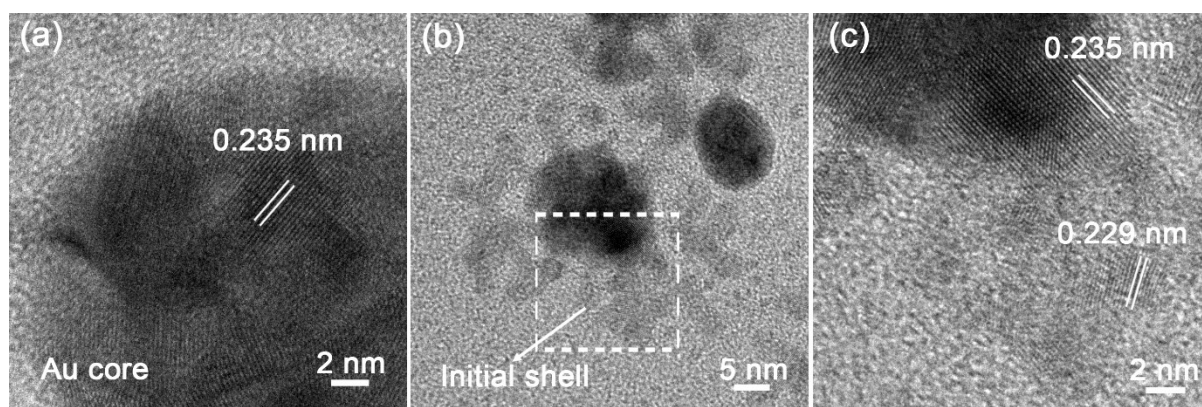

**Fig. S9** (a) High-resolution TEM image of Au core, (b) high-magnification TEM image of initial shells, and (c) high-resolution TEM images of both Au core and PdAuCu shell. A lattice of 0.235 nm could be found in the initial nanoparticle, indicating the formation of elemental Au cores. The subsequent shell possess a lattice of  $\sim 0.229$  nm, which could be indexed to trimetallic PdAuCu. These results further confirmed the formation of elemental Au cores and trimetallic PdAuCu shells.

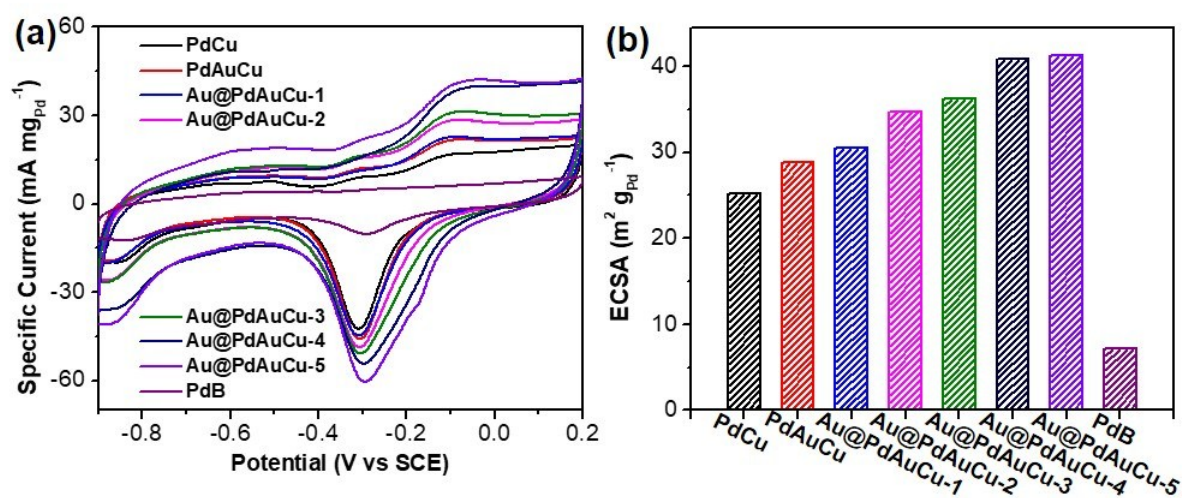

**Fig. S10** (a) CV curves and (b) summarized ECSAs of PdCu MNSs, PdAuCu MNSs, Au@PdAuCu-1 MNSs, Au@PdAuCu-2MNSs, Au@PdAuCu-3 MNSs, Au@PdAuCu-4 MNSs, Au@PdAuCu-5 MNSs, and PdB collected in 1.0 M KOH with a scan rate of  $50 \text{ mV s}^{-1}$ .



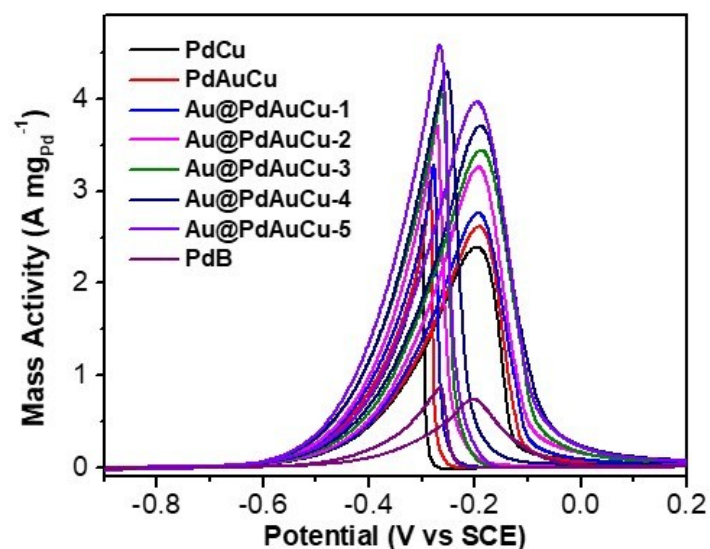

**Fig. S11** CV curves of PdCu MNSs, PdAuCu MNSs, Au@PdAuCu-1 MNSs, Au@PdAuCu-2MNSs, Au@PdAuCu-3 MNSs, Au@PdAuCu-4 MNSs, Au@PdAuCu-5 MNSs, and PdB collected in 1.0 M KOH and 1.0 M ethanol with a scan rate of  $50 \text{ mV s}^{-1}$ .

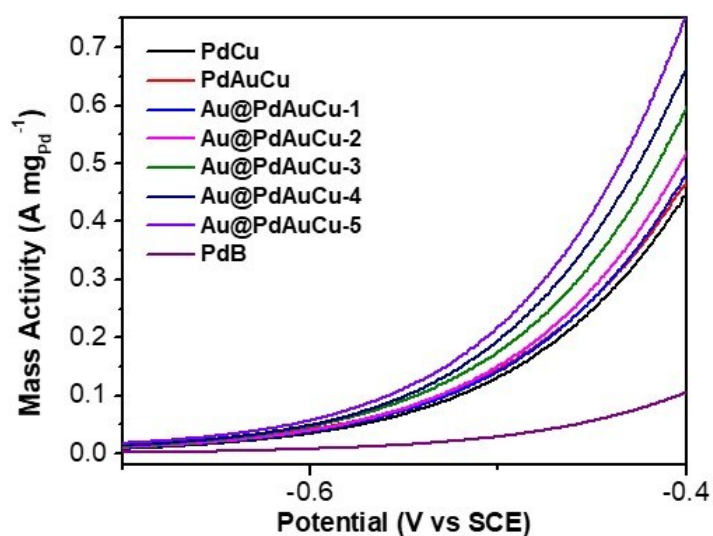

**Fig. S12** Onset potentials of PdCu MNSs, PdAuCu MNSs, Au@PdAuCu-1 MNSs, Au@PdAuCu-2MNSs, Au@PdAuCu-3 MNSs, Au@PdAuCu-4 MNSs, Au@PdAuCu-5 MNSs, and PdB collected in 1.0 M KOH and 1.0 M ethanol.

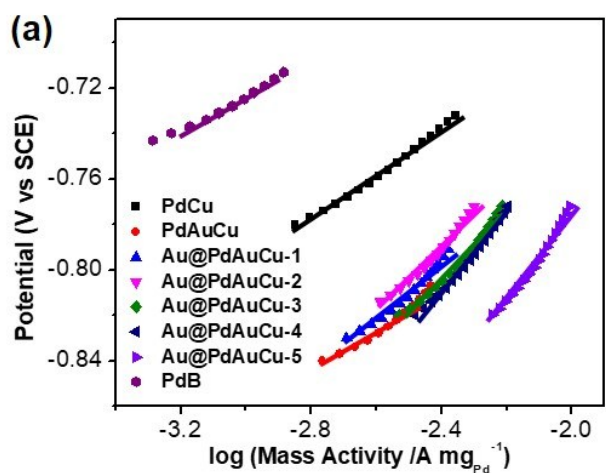

**Fig. S13** Tafel plots of PdCu MNSs, PdAuCu MNSs, Au@PdAuCu-1 MNSs, Au@PdAuCu-2MNSs, Au@PdAuCu-3 MNSs, Au@PdAuCu-4 MNSs, Au@PdAuCu-5 MNSs, and PdB.

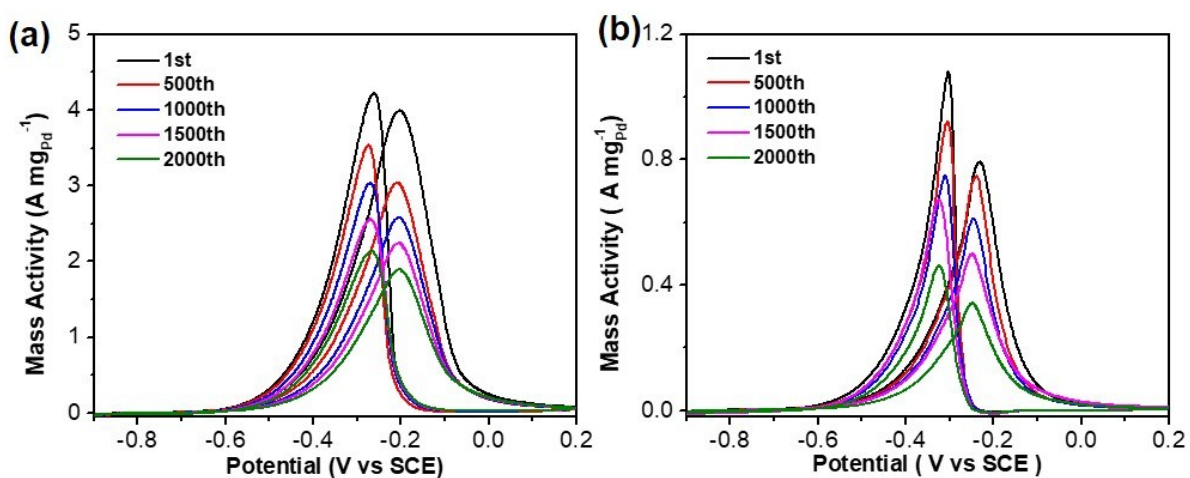

**Fig. S14** CV curves of (a) Au@PdAuCu-5 MNSs and (b) PdB after 2000 successive scans.



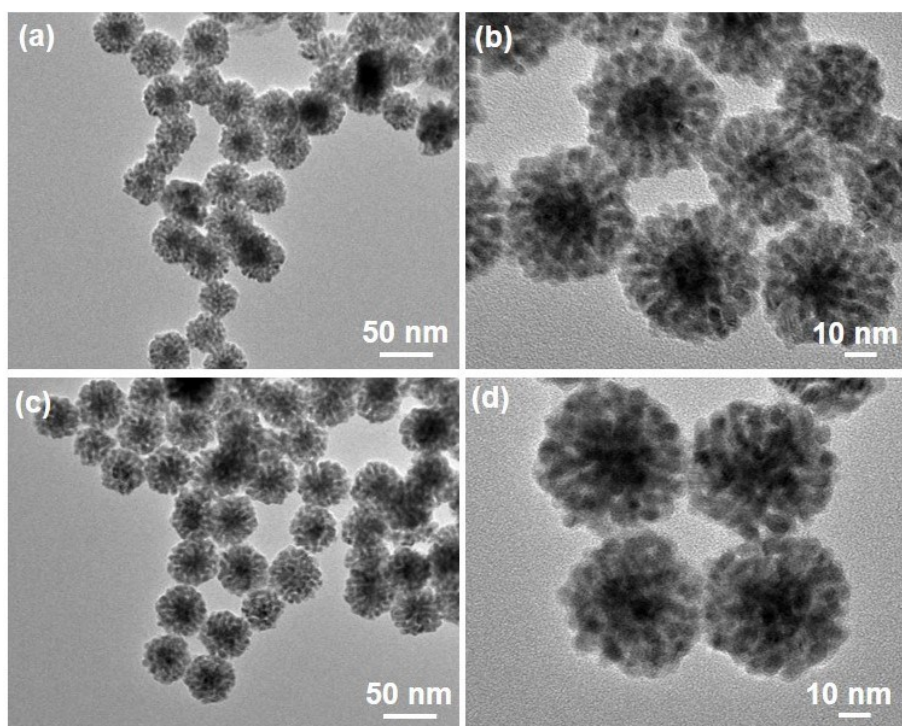

**Fig. S15** TEM images of (a, b) core-shell Au@PdAu and (c, d) Au@PdAuAgCu MNSs.

Ethanol electrooxidation proceeds on Pd catalysts according to the following mechanisms:

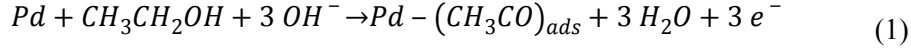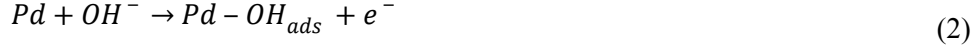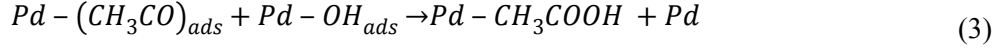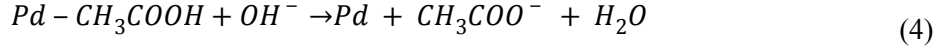

The rate-determining step of electrochemical EOR is the oxidation/removal of poisoning carbonaceous intermediates on Pd ( $Pd-(CH_3CO)_{ads}$ ) by adsorbed OH ( $OH_{ads}$ ) (Eq. 3). For core-shell Au@PdAuCu MNSs, strictly speaking, all of three metals (Pd, Au, Cu) act as the active sites simultaneously, although they possess different roles for ethanol electrooxidation. First, ethanol was oxidized on Pd atoms into carbonaceous intermediates of  $(CH_3CO)_{ads}$  which strongly adsorbed on Pd ( $Pd-(CH_3CO)_{ads}$ ) to inactivate the Pd catalyst. By contrast, oxophilic metals of Au and Cu can effectively facilitate the adsorption and formation of  $OH_{ads}$  by  $Au-OH_{ads}$  and  $Cu-OH_{ads}$ . Therefore, the reaction between  $Pd-(CH_3CO)_{ads}$  and  $Au-OH_{ads}/Cu-OH_{ads}$  kinetically accelerates the reaction/removal of  $(CH_3CO)_{ads}$  and thus improves electrocatalytic performance (bifunctional effect). Besides, alloying Pd with Au and Cu could greatly change the electron energy state and reduce the adsorption energy of  $(CH_3CO)_{ads}$  on Pd atoms (electronic effect).

**Table S1.** Summarization of electrochemical EOR performance of different electrocatalysts in alkaline solution.

| Electrocatalyst                                   | Electrolyte |       | Peak current from CV<br>(mA mg <sup>-1</sup> )<br>50 mV s <sup>-1</sup> | Reference                                     |
|---------------------------------------------------|-------------|-------|-------------------------------------------------------------------------|-----------------------------------------------|
|                                                   | Ethanol     | KOH   |                                                                         |                                               |
| Au@PdAuCu<br>MNSs                                 | 1 M         | 1 M   | 3990                                                                    | This work                                     |
| PdCo nanotube<br>/carbon cloth                    | 1 M         | 1 M   | ~1500                                                                   | Angew. Chem. Int. Ed. 2015 , 54 ,<br>3669     |
| Au@AgPd<br>Nanoparticles                          | 1 M         | 1 M   | 1160                                                                    | J. Phys. Chem. C 2015, 119, 18434             |
| Au@Pd Core–<br>Shell Nanorods                     | 1 M         | 1 M   | 2920                                                                    | Adv. Mater. 2017, 29, 1701331                 |
| PdAg hollow<br>nanoflowers                        | 1 M         | 1 M   | 1616                                                                    | Chem. Eur. J. 2016, 22, 16642                 |
| PdCu <sub>2</sub><br>Nanoparticles                | 1 M         | 1 M   | 1600                                                                    | ACS Appl. Mater. Interfaces 2016,<br>8, 34497 |
| PdCu<br>nanocapsules                              | 1 M         | 1 M   | 1140                                                                    | Nanoscale, 2014, 6, 2768                      |
| Pd <sub>4</sub> Au <sub>1</sub><br>-P/CNT         | 1 M         | 1 M   | 2296                                                                    | J. Catal. 2017, 353, 256                      |
| Pd <sub>1</sub> Ag <sub>1</sub> NPs/GO            | 1 M         | 1 M   | 1601                                                                    | J. Power Sources<br>2014, 263, 13.            |
| PdCo/N-doped<br>Carbon                            | 1 M         | 1 M   | 1250                                                                    | J. Mater. Chem. A 2017, 5, 10876              |
| PdNi Hollow<br>Nanospheres                        | 1 M         | 1 M   | 3630                                                                    | Angew. Chem. Int. Ed. 2015, 54,<br>1310       |
| Pd/Ru<br>nanodendrites                            | 1 M         | 1 M   | 1150                                                                    | Nanoscale 2015, 7,<br>12445                   |
| Pd-NiCoO <sub>x</sub><br>/C                       | 1 M         | 0.5 M | ~450                                                                    | J. Power Sources<br>2015, 273, 631            |
| 10.8-nm-thick<br>PdPt NWs                         | 0.5 M       | 1 M   | 940                                                                     | Adv. Mater. 2012, 24, 2326                    |
| Pd <sub>7</sub> /Ru <sub>1</sub><br>nanodendrites | 1 M         | 1 M   | ~1150                                                                   | Nanoscale 2015, 7, 12445                      |
